# Supplementary material for: How space-charge behaviour at grain boundaries in electroceramic oxides is modified by two restricted equilibria
Source: Royal Society of Chemistry journal article supplement (doi:10.1039/d3cp05870k), 2024-01-01
Supplement: d3cp05870k1.pdf [file d3cp05870k1.pdf]

# The variation in the space-charge potential at grain boundaries in SrTiO<sub>3</sub>: the effects of two restricted equilibria

— Supplemental Information —

Adrian L. Usler, Fabian Ketter, Roger A. De Souza

## S1 Explanations of the temperature dependence of $\Phi_0$

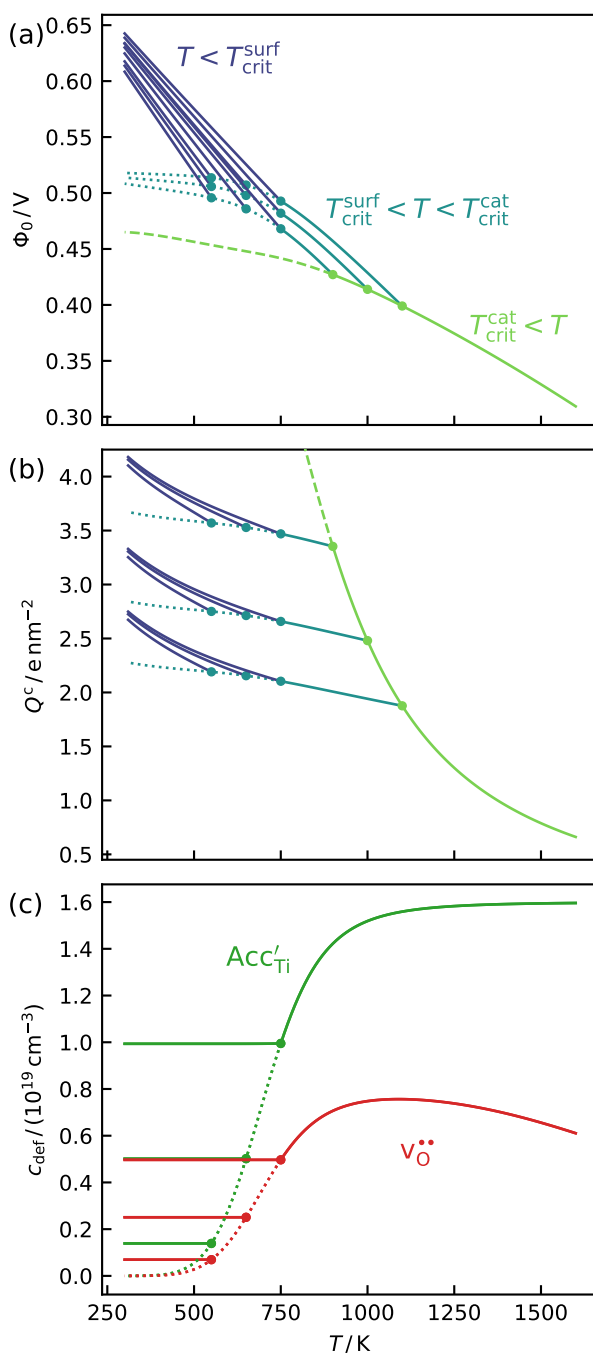

**Figure S1:** Temperature dependence of (a) the space-charge potential,  $\Phi_0$ ; (b) the grain-boundary core charge,  $Q^c$ ; and (c) the bulk defect concentrations of  $\text{Acc}'_{\text{Ti}}$  and  $v_{\text{O}}^{\bullet\bullet}$ , with the temperature range encompassing the full-equilibrium (FE) as well as one restricted-equilibrium (1RE) and two restricted-equilibria (2RE) scenarios.

$\Phi_0(T)$  steepens both at  $T_{\text{crit}}^{\text{cat}}$  and  $T_{\text{crit}}^{\text{surf}}$ , but the reasons in both cases are quite different. The steepening below  $T_{\text{crit}}^{\text{surf}}$  may be attributed to a steeper increase in the grain-boundary core charge,  $Q^c(T)$ . The abrupt change in the core charge's behaviour may be explained with  $c^b(v_{\text{O}}^{\bullet\bullet})$  abruptly staying constant below  $T_{\text{crit}}^{\text{cat}}$ , at a value that is much higher than the chemical equilibrium concentrations for  $T < T_{\text{crit}}^{\text{cat}}$ . Larger  $Q^c$  generally have an enhancing effect on  $\Phi_0$ . Consistently, the  $\Phi_0$  values at a specific temperature are higher in the 2RE regime than in the 1RE regime. The abrupt steepening in  $\Phi_0(T)$  at  $T_{\text{crit}}^{\text{cat}}$ , in contrast, stands opposed to an abrupt flattening in  $Q^c(T)$ . Increases in  $Q^c$  can be accommodated much more effectively in the FE regime than in the RE regimes, where an enrichment in  $\text{Acc}'_{\text{Ti}}$  is possible only by a valence change. Owing to this weaker shielding capability, the space-charge layer reacts, in the 1RE regime, much more sensitively to increases in  $Q^c$  than it does in the FE regime, and hence,  $\Phi_0$  increases more steeply despite the flatter increase in  $Q^c$ .

## S2 Different grain-boundary parameters

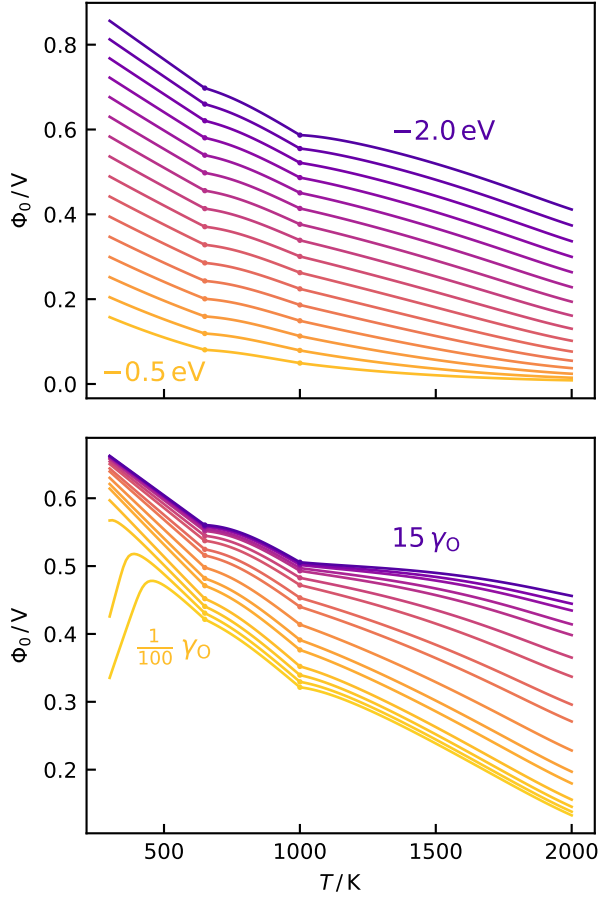

**Figure S2:** Temperature dependence of the space-charge potential,  $\Phi_0$ , for different grain-boundary parameters: (a) different values of the  $v_{\text{O}}^{\bullet}$  segregation energy,  $\Delta\mu_v^{\ominus}$  (with  $\gamma_{\text{O}}^c = \gamma_{\text{O}}/20$ ); (b) different values of the core oxygen-site density,  $\gamma_{\text{O}}^c$  (with  $\Delta\mu_v^{\ominus} = -1.5$  eV). In all cases, we set  $T_{\text{crit}}^{\text{cat}} = 1000$  K and  $T_{\text{crit}}^{\text{surf}} = 650$  K.

Clearly, the non-trivial temperature dependence of  $\Phi_0$  with kinks at the critical temperatures applies over a wide range of grain-boundary core properties, i.e., the differences that are due to different temperature ranges must be expected to be encountered across different grain-boundary types.
